# Supplementary material
Source: MDPI journal article supplement (https://www.mdpi.com/2073-4344/9/4/339)
Supplement: s1 [file s1]

## Supplementary Information

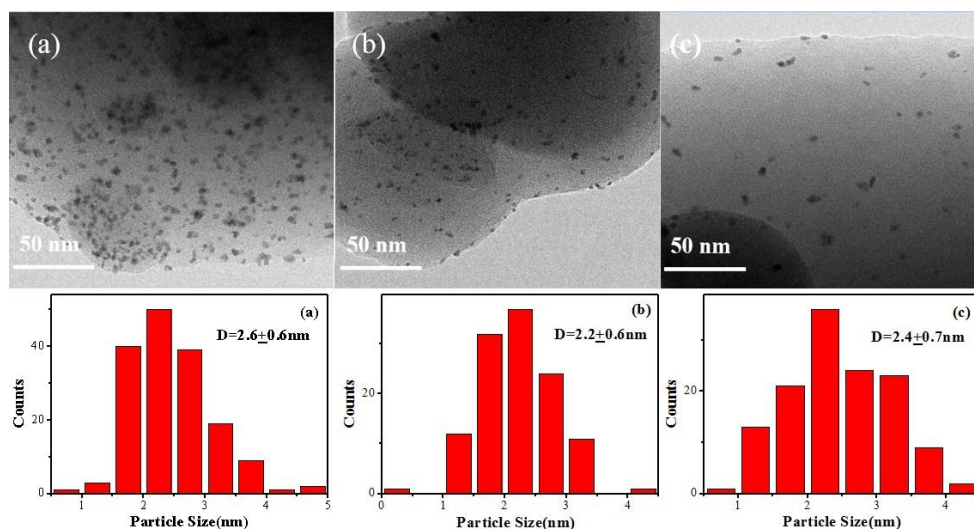

**Figure S1.** TEM images and corresponding size distribution of Pt<sub>0.8</sub>/SiO<sub>2</sub>-Shiff (a), Pt<sub>0.5</sub>/SiO<sub>2</sub>-Shiff (b) and Pt<sub>0.3</sub>/SiO<sub>2</sub>-Shiff (c).

© 2019 by the authors. Licensee MDPI, Basel, Switzerland. This article is an open access article distributed under the terms and conditions of the Creative Commons Attribution (CC BY) license (<http://creativecommons.org/licenses/by/4.0/>).
